# Supplementary material for: Photoluminescence from amino functionalized graphene quantum dots prepared by electrochemical exfoliation method in the presence of ammonium ions
Source: Royal Society of Chemistry journal article supplement (doi:10.1039/c6ra28742e), 2017-01-01
Supplement: c6ra28742e1.pdf [file c6ra28742e1.pdf]

### Supporting Information

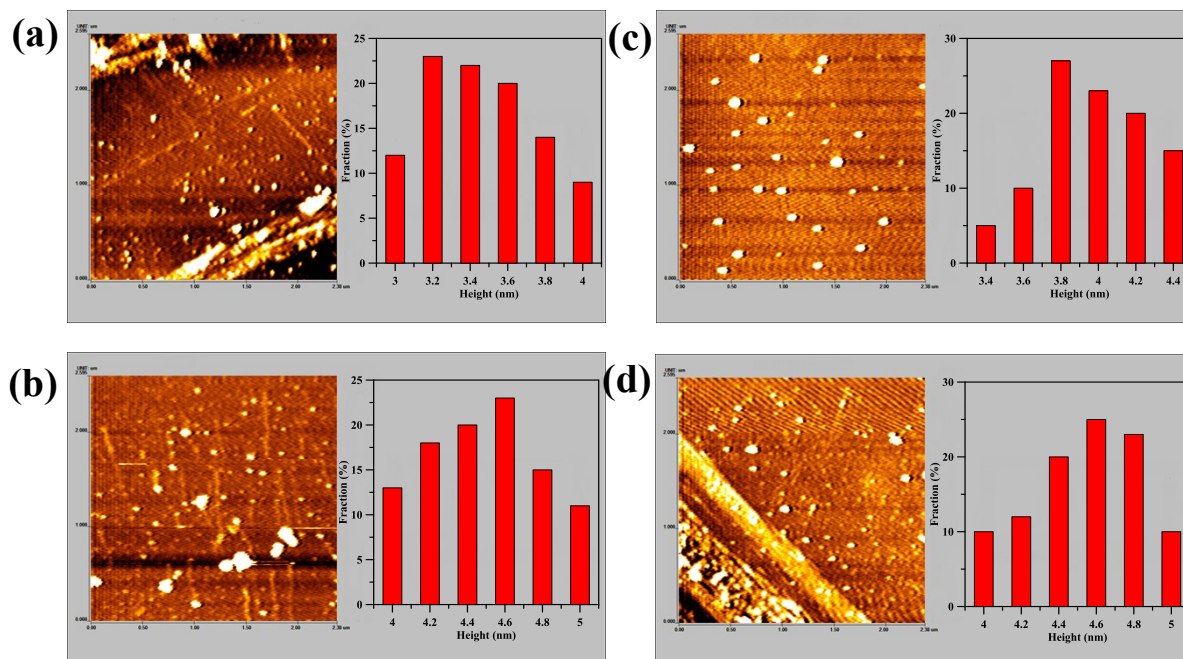

Figure S1. AFM images and their size-distribution histograms: (a) NGQD-5, (b) NGQD-7, (c) NGQD-9, and (d) NGQD-12.

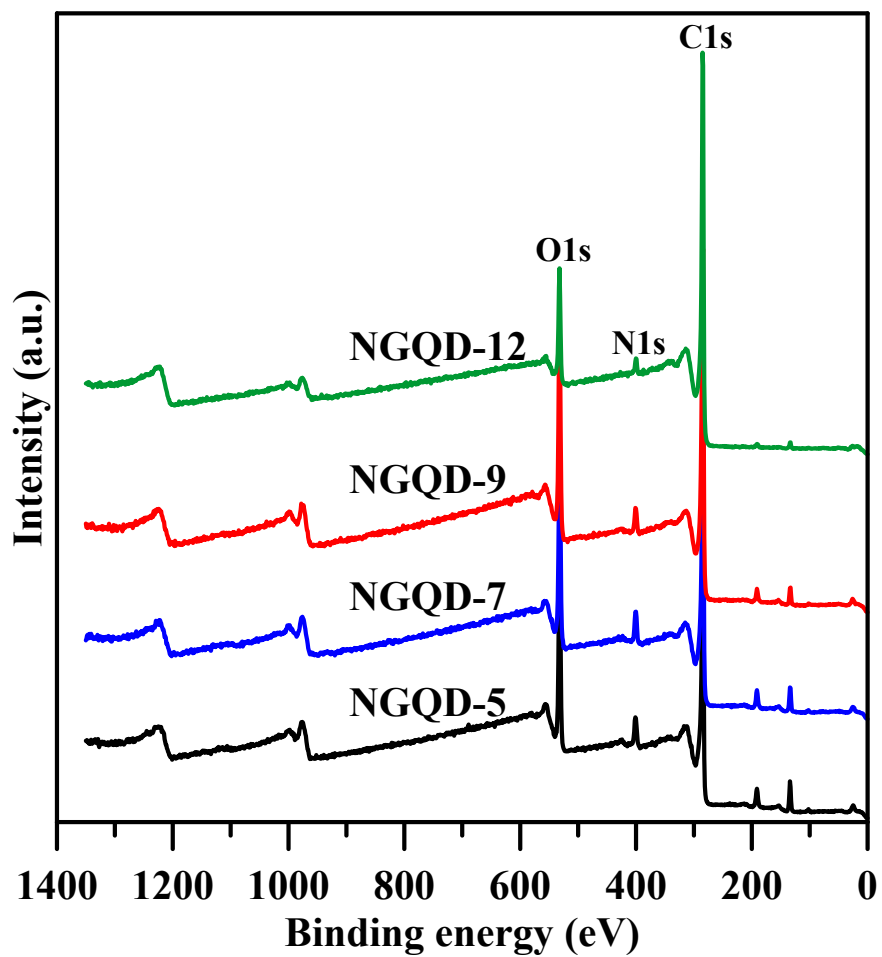

Figure S2. The full-range XPS spectra of N-modified GN sample: (a) NGQD-5, (b) NGQD-7, (c) NGQD-9, and (d) NGQD-12.
